# Supplementary material for: Crystal structure of Helicobacter pylori MinE, a cell division topological specificity factor
Source: PubMed Central journal article supplement (PMC2883074; doi:10.1111/j.1365-2958.2010.07160.x), 2010-04-27
Supplement: mmi0076-1222-SD1.pdf [file mmi0076-1222-SD1.pdf]

## Supporting information

### Supplementary Methods

#### Analytical gel filtration

*HpMinE*, *HpMinE* $\Delta$ N and *EcMinE* $\Delta$ N were expressed with N-terminal His-tags (pET28b vector), after which the His-tags were removed for analytical gel filtration analysis. Because of problems during purification when the N-terminal His-tag (pET28b vector) was used, *EcMinE* was expressed with a C-terminal His-tag (pET21a vector) and then purified. The purified proteins (0.5 mM in 100  $\mu$ l of buffer) were subjected to analytical gel filtration run at 0.5 ml/min on a Superdex 75 10/300 GL column (Pharmacia) equilibrated with 20 mM HEPES-NaOH (pH 7.0), 150 mM NaCl and 10% glycerol. *EcMinE*, *HpMinE*, *EcMinE* $\Delta$ N and *HpMinE* $\Delta$ N eluted at molecular masses of 30.1 kDa, 29.7 kDa, 20.6 kDa and 18.7 kDa, respectively (Table S1). Molecular weight standards [bovine serum albumin (66,000 Da), carbonic anhydrase (29,000 Da), cytochrome C (12,400 Da) and aprotinin (6,500 Da)] were used for the calibration.

#### Structural model building

The comparative modeling program MODELLER v8 (Sali and Blundell, 1993) was used to generate the model of the *HpMinD* structure. Among four MinD structures with ADP or AMPPCP or without a nucleotide, *Pyrococcus furiosus* MinD (PDB code 1G3R, AMPPCP complex structure, monomer) showed the highest sequence identity (29.5% and 53.4% homology) with *HpMinD* and was used as the template for modeling the structure of the *HpMinD* monomer (residues 1-252). The structure of the Fe-protein from *Azotobacter vinelandii* (NifH) was previously used to generate a model of the structure of the MinD dimer (Lutkenhaus and Sundaramoorthy, 2003), and we also used the NifH dimer topology (PDB code 1N2C) to model the structure of the *HpMinD* dimer. In addition, the disordered regions of the *HpMinE* dimer structure (residues 1-12 in MolA/residues 1-15 in MolB) were modeled based on a secondary chemical shift analysis of *Neisseria gonorrhoeae* MinE showing the N-terminal portion of the anti-MinCD domain has an  $\alpha$ -helix (residues 3-8 in *HpMinE*).

## Supplementary Figures

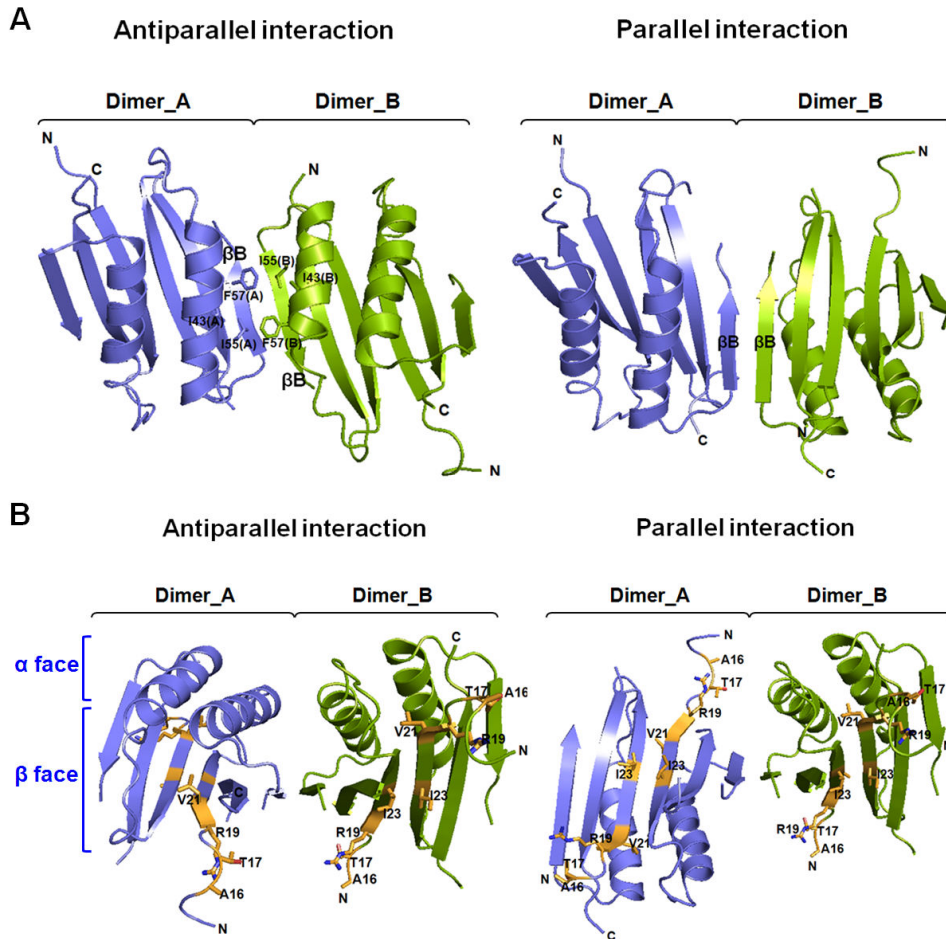

**Figure S1.** Comparison of antiparallel and parallel interactions within the structure of the MinE tetramer. (A) Dimer-dimer interface within the *HpMinE* structure. (B) Representation of *HpMinE* residues that correspond to mutated *EcMinE* residues used to determine which residues are important for the interaction with MinD. *EcMinE* residues R10, K11, K12, A18, K19, R21 and I25 (K10, G11, S12, A16, T17, I23, T17/R19 in *HpMinE*) were located at the dimer interface and were exposed to the  $\beta$ -face; residues I25, D45 and V49 in *EcMinE* (I23, E41 and V45 in *HpMinE*) were not.

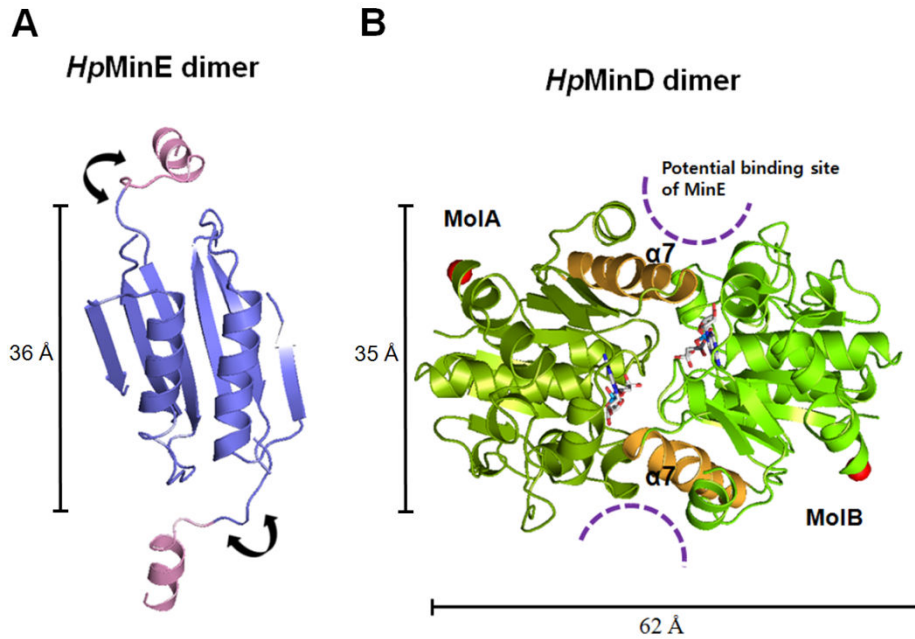

**Figure S2.** Molecular modeling of the *HpMinE* anti-MinCD domain and the *HpMinD* dimer. (A) Ribbon view showing the *HpMinE* dimer structure, including the modeled anti-MinCD domain (magenta). Flexible linker regions between the anti-MinCD domain and the TSD are indicated in arrows. (B) Ribbon view showing the modeled *HpMinD* dimer structure. Helix  $\alpha 7$  (orange) of MinD is located at the edge of the dimer interface. The C-terminus of *HpMinD*, which is responsible for interacting with the membrane, is shown as a red sphere.

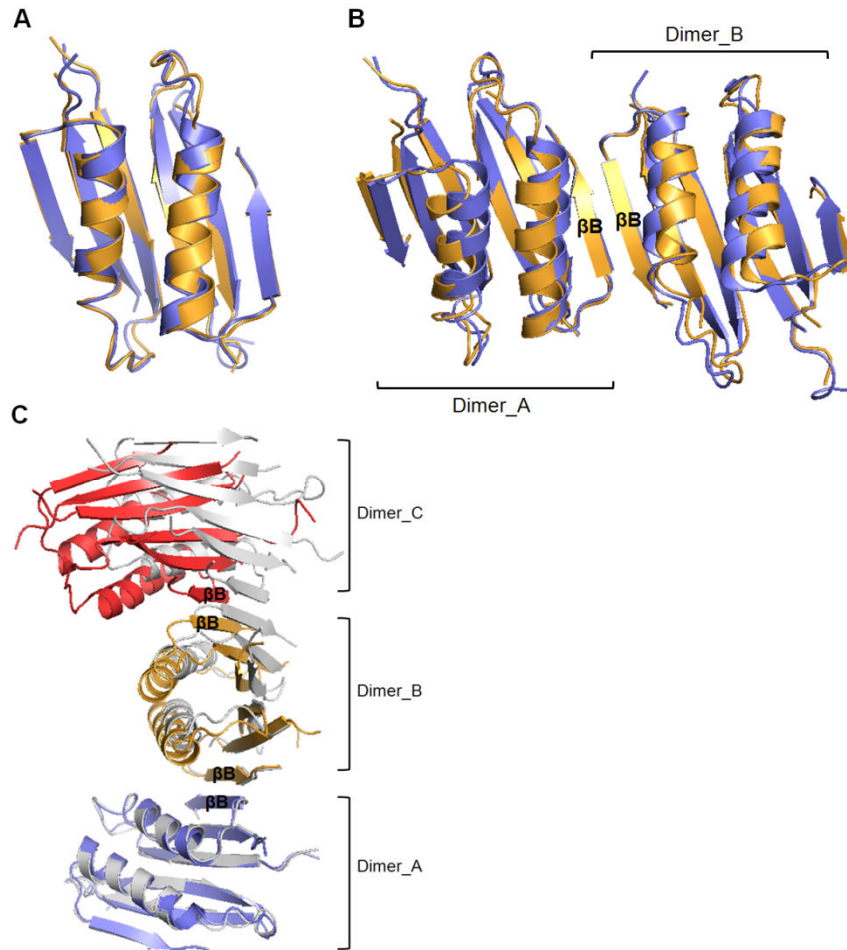

**Figure S3.** Comparison of the P6<sub>4</sub> and P6<sub>5</sub> structures of *HpMinE*. (A) and (B) Superposition of the P6<sub>4</sub> and P6<sub>5</sub> structures of the *HpMinE* dimer (A) and tetramer (B). (C) Superposition of the P6<sub>4</sub> and P6<sub>5</sub> structures of the *HpMinE* hexamer. P6<sub>4</sub> and P6<sub>5</sub> are shown in blue and gray, respectively. The rotation angle along the multimerization axis was calculated using DynDom (Lee *et al.*, 2003).

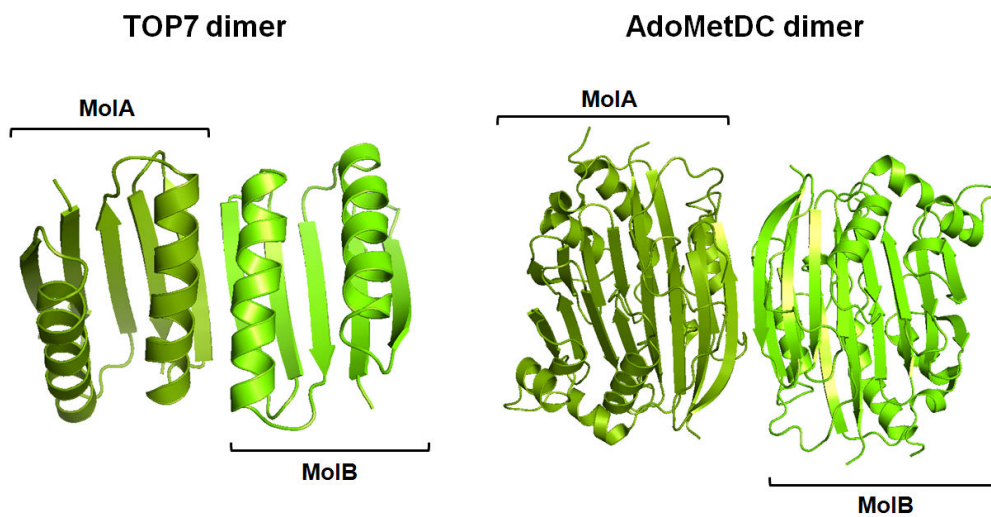

**Figure S4.** Structures of the TOP7 and AdoMetDC dimers. A DALI search of the MinE dimer revealed two homologous structures, TOP7 ( $Z_{\text{score}} = 6.4$ , RMSD = 2.1 Å) and S-adenosylmethionine decarboxylase ( $Z_{\text{score}} = 5.2$ , RMSD = 3.8 Å). Both of these structures form dimers through antiparallel  $\beta$ -strand interactions.

## Supplementary Table

**Table S1.** Analytical gel filtration results for wild-type MinE and its deletion mutants.

|                          | M.W.<br>(kDa) | Superdex 75, analytical             |                                       |                              |
|--------------------------|---------------|-------------------------------------|---------------------------------------|------------------------------|
|                          |               | Elution volume<br>(ml) <sup>a</sup> | Calculated M.W.<br>(kDa) <sup>a</sup> | Expected size of<br>oligomer |
| <i>Ec</i> MinE (1-88)    | 11.3          | 11.82 ± 0.03                        | 30.1 ± 0.3                            | 2.7                          |
| <i>Ec</i> MinEΔN (32-88) | 7.0           | 11.85 ± 0.02                        | 29.7 ± 0.2                            | 4.2                          |
| <i>Hp</i> MinE (1-77)    | 9.4           | 12.81 ± 0.01                        | 20.6 ± 0.1                            | 2.2                          |
| <i>Hp</i> MinEΔN (29-77) | 6.2           | 13.07 ± 0.01                        | 18.7 ± 0.1                            | 3.0                          |

<sup>a</sup>Mean ± the standard error of the mean.

## Supplementary References

- Lutkenhaus, J., and Sundaramoorthy, M. (2003) MinD and role of the deviant Walker A motif, dimerization and membrane binding in oscillation. *Mol Microbiol* 48: 295-303.
- Sali, A., and Blundell, T.L. (1993) Comparative protein modeling by satisfaction of spatial restraints. *J Mol Biol* 234: 779-815.
- Lee, R.A., Razaz, M., and Hayward, S. (2003) The DynDom database of protein domain motions. *Bioinformatics* 19: 1290-1291.
